# Supplementary material for: Occupational health risks from welding emissions: exposure and deposition of PM 10 , PM 2.5 , and ultrafine particles across welding methods
Source: Royal Society of Chemistry journal article supplement (doi:10.1039/d5va00142k), 2025-10-23
Supplement: d5va00142k1.pdf [file d5va00142k1.pdf]

## **Occupational Health Risks from Welding Emissions: Exposure and Deposition of PM<sub>10</sub>, PM<sub>2.5</sub>, and Ultrafine Particles Across Welding Methods**

Rubal Dhiman<sup>a</sup>, Adarsh Prakash<sup>a</sup>, Subhrajyoti Saroj<sup>a</sup>, Priyabrata Sahoo<sup>a</sup>, Anirudha Ambekar<sup>a,c</sup>, Sachin D Kore<sup>a</sup>, Thaseem Thajudeen<sup>a,b,c,\*</sup>, Sarath K. Guttikunda<sup>d</sup>

<sup>a</sup> School of Mechanical Sciences, Indian Institute of Technology (IIT) Goa, India

<sup>b</sup> Center of Excellence in Colloids, Particulates and Interfaces, Indian Institute of Technology (IIT) Goa, India

<sup>c</sup> Center of Excellence in Sustainable Energy, Indian Institute of Technology (IIT) Goa, India

<sup>d</sup> TRIP-Centre, Indian Institute of Technology New Delhi, India

\*Corresponding author. Tel: +91-832-2490-859

E-mail address: thaseem@iitgoa.ac.in

Office of the Dean (R&D)  
Administrative Block,  
Indian Institute of Technology Goa,  
Goa College of Engineering Campus,  
Farmagudi, Goa. 403401. India.

### **S1: Relative Risk (RR), Excess Risk (ER), and Attributable Fraction (AF)**

The Environmental Burden of Disease (EBD) framework involves estimating key epidemiological metrics, including relative risk (RR), excess risk (ER), and attributable fraction (AF). The RR for all-cause mortality due to short-term exposure to PM<sub>10</sub> was determined using the equation proposed by <sup>1</sup>. RR represents the likelihood of adverse health effects, such as all-cause mortality or lung cancer mortality, in a population exposed to elevated air pollution levels compared to a background level with minimal anthropogenic pollution (68 µg/m<sup>3</sup> for PM<sub>10</sub>). For all-cause mortality, RR is calculated using the following equation <sup>2</sup>:

$$RR = \exp[\beta (X - X_0)]$$

The RR is calculated using key parameters, including the coefficient of the risk function ( $\beta$ ), the mean pollutant concentration ( $X$ ), and the baseline concentration of PM<sub>10</sub> ( $X_0$ ): 68 µg/m<sup>3</sup>, which is measured before the start of the experiment. Additionally, the relative risk of cardiopulmonary and lung cancer mortality in individuals due to long-term exposure to PM<sub>2.5</sub> was calculated using the following approach <sup>2</sup>:

$$RR = \left[ \frac{(X + 1)}{(X_0 + 1)} \right]^\beta$$

The RR is determined based on the mean PM<sub>2.5</sub> concentration ( $X$ ) and the baseline concentration of PM<sub>2.5</sub> ( $X_0$ ) (40 µg/m<sup>3</sup>).

Once the RR is determined, the attributable fraction (AF) is estimated as <sup>2</sup>:

$$AF = \frac{(RR - 1)}{RR}$$

The attributable fraction (AF) represents the proportion of disease-related deaths, such as lung cancer, that could be prevented if PM levels were reduced to 10 µg/m<sup>3</sup> for PM<sub>10</sub> and 3 µg/m<sup>3</sup> for PM<sub>2.5</sub>, respectively <sup>2</sup>. In the above expression,  $RR - 1$  is equivalent to excess risk (ER).

Table S1 (a): PM<sub>2.5</sub> (µg/m<sup>3</sup>) for shielded metal arc welding for different current intensities at welding height and breathing height (Amps representing amperes)

| SMAW               | Welding Height (WH) |     |         |         | Breathing Height (BH) |     |         |         |
|--------------------|---------------------|-----|---------|---------|-----------------------|-----|---------|---------|
|                    | Average             | SD  | Minimum | Maximum | Average               | SD  | Minimum | Maximum |
| Ambient            | 56                  | 1   | 55      | 58      | 55                    | 1   | 54      | 56      |
| 50 Amps            | 360                 | 142 | 63      | 530     | 650                   | 228 | 57      | 980     |
| Before 75 Amperes  | 70                  | 4   | 66      | 77      | 50                    | 1   | 49      | 51      |
| 75 Amps            | 630                 | 205 | 114     | 992     | 1200                  | 382 | 113     | 1753    |
| Before 100 Amperes | 42                  | 3   | 38      | 46      | 26                    | 3   | 24      | 32      |
| 100 Amps           | 1210                | 541 | 95      | 1916    | 2380                  | 397 | 1502    | 3060    |
| Before 125 Amperes | 40                  | 7   | 29      | 50      | 30                    | 5   | 23      | 38      |
| 125 Amps           | 1600                | 760 | 29      | 2341    | 2780                  | 815 | 201     | 3572    |
| After 125 Amperes  | 40                  | 8   | 28      | 52      | 39                    | 8   | 27      | 51      |

Table S1 (b): PM<sub>10</sub> (µg/m<sup>3</sup>) for shielded metal arc welding for different current intensities at welding height and breathing height (Amps representing amperes)

| SMAW               | Welding Height (WH) |     |         |         | Breathing Height (BH) |      |         |         |
|--------------------|---------------------|-----|---------|---------|-----------------------|------|---------|---------|
|                    | Average             | SD  | Minimum | Maximum | Average               | SD   | Minimum | Maximum |
| Ambient            | 60                  | 3   | 54      | 65      | 60                    | 1    | 58      | 65      |
| 50 Amps            | 370                 | 107 | 176     | 532     | 900                   | 182  | 860     | 1083    |
| Before 75 Amperes  | 80                  | 3   | 88      | 99      | 70                    | 1    | 63      | 76      |
| 75 Amps            | 630                 | 81  | 485     | 770     | 1890                  | 550  | 1325    | 2692    |
| Before 100 Amperes | 60                  | 5   | 59      | 76      | 75                    | 8    | 65      | 91      |
| 100 Amps           | 1260                | 408 | 549     | 1808    | 3840                  | 953  | 3294    | 4665    |
| Before 125 Amperes | 60                  | 24  | 38      | 90      | 70                    | 19   | 41      | 91      |
| 125 Amps           | 1970                | 723 | 809     | 3020    | 4350                  | 1115 | 1069    | 5928    |

Table S2 (a): Total number concentration (TNC) ( $\#/cm^3$ ) for shielded metal arc welding (SMAW) for different current intensities at welding height and breathing height (TNC values rounded to the nearest hundred and ambient reading is just before the experiment inside the workshop) (Amps is representing amperes)

| SMAW                | TNC at welding height (1.1 m) |        |         |         | TNC at breathing height (1.5 m) |        |         |         |
|---------------------|-------------------------------|--------|---------|---------|---------------------------------|--------|---------|---------|
|                     | Average                       | SD     | Minimum | Maximum | Average                         | SD     | Minimum | Maximum |
| Ambient 50<br>Amps  | 6860                          | 370    | 6320    | 7380    | 8080                            | 250    | 7730    | 8390    |
| 50 Amps             | 853500                        | 738500 | 119000  | 2380000 | 1307800                         | 858100 | 118000  | 3170000 |
| Ambient 75<br>Amps  | 9600                          | 1300   | 7700    | 11400   | 5130                            | 190    | 4960    | 5460    |
| 75 Amps             | 1612000                       | 992300 | 118000  | 3380000 | 1490200                         | 766600 | 366000  | 3260000 |
| Ambient<br>100 Amps | 5900                          | 370    | 5310    | 6430    | 4110                            | 150    | 3870    | 4320    |
| 100 Amps            | 1383300                       | 769900 | 466000  | 2790000 | 1372500                         | 476100 | 651000  | 2440000 |
| Ambient<br>125 Amps | 7606                          | 650    | 6870    | 8690    | 8530                            | 1430   | 6760    | 10900   |
| 125 Amps            | 1569200                       | 791700 | 659000  | 3270000 | 2361600                         | 755700 | 1390000 | 4190000 |

Table S2 (b): Total number concentration (TNC) ( $\#/cm^3$ ) and  $PM_{2.5}/PM_{10}$  ( $\mu g/m^3$ ) for wire additive arc manufacturing for different current and voltage intensities (TNC values rounded to the nearest hundred and ambient reading is just before the experiment inside the workshop) (Amps is representing amperes).

| WAAM                         | TNC ( $\#/cm^3$ ) |         |         |         | $PM_{2.5}/PM_{10}$ ( $\mu g/m^3$ ) |         |           |           |
|------------------------------|-------------------|---------|---------|---------|------------------------------------|---------|-----------|-----------|
|                              | Average           | SD      | Minimum | Maximum | Average                            | SD      | Minimum   | Maximum   |
| Ambient 18 Volts 65<br>Amps  | 10710             | 4240    | 6680    | 16200   | 49/61                              | 1/2     | 47/59     | 55/65     |
| 18 Volts 65 Amps             | 2720000           | 1090000 | 659000  | 4360000 | 1302/2200                          | 169/400 | 1100/1260 | 1734/2800 |
| Ambient 20 Volts<br>125 Amps | 31800             | 14830   | 29700   | 34300   | 62/89                              | 1/4     | 59/87     | 65/100    |
| 20 Volts 125 Amps            | 1440000           | 430000  | 902000  | 2180000 | 916/1851                           | 163/409 | 763/1197  | 1403/2552 |



### S1.1 Quantification of size-segregated PM deposition in the TB region

This study also evaluated the deposited mass (Figure S1) and mass per unit area (Figures S2 and S3) for SMAW and WAAM under varying current and voltage conditions. PM<sub>10</sub> exhibited the peak value of deposition in the TB region due to its larger particle size compared to PM<sub>2.5</sub>. During SMAW, peak PM<sub>10</sub> deposition in the TB region across all amperages, with the 16–20 age group recording peak deposition masses of  $2.8 \times 10^{-3} \mu\text{g}$ ,  $5.9 \times 10^{-3} \mu\text{g}$ ,  $0.0121 \mu\text{g}$ , and  $0.0137 \mu\text{g}$  at 50, 75, 100, and 125 amperes, respectively (Figure S1).

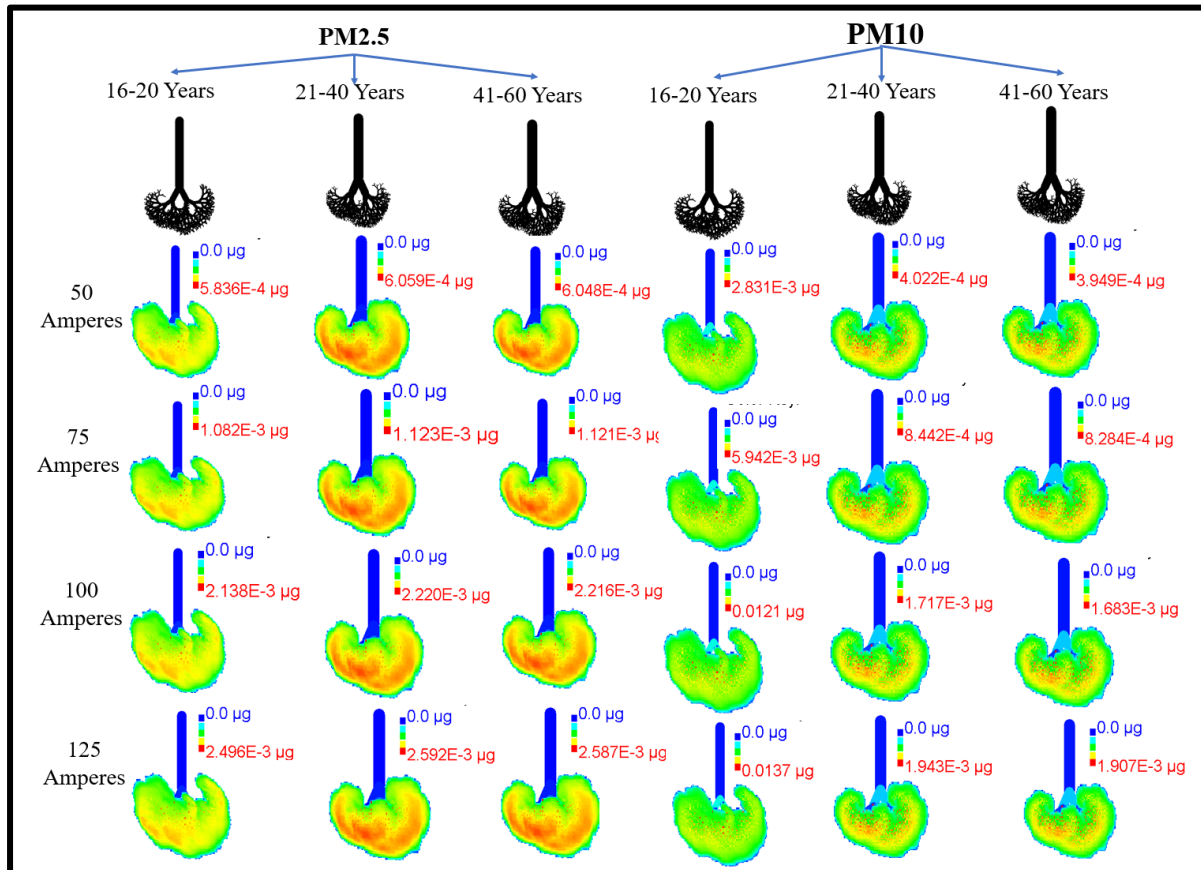

Figure S1: Visualizations of mass deposition in the tracheobronchial (TB) region for PM<sub>10</sub> and PM<sub>2.5</sub> across different age groups (measured in  $\mu\text{g}$ ) for shielded metal arc welding (SMAW) at different current intensities are presented. The color scales for mass deposition differ between particle sizes and age categories due to software limitations, which restricted uniform adjustment of scale settings.

The peak PM<sub>2.5</sub> deposition, in contrast, showed an increasing trend with age. The 16–20 age group exhibited the peak value of PM<sub>2.5</sub> deposition, which was lowest across all amperages, ranging from  $5.8 \times 10^{-4} \mu\text{g}$  to  $2.4 \times 10^{-3} \mu\text{g}$ , while the 21–40 and 41–60 age groups recorded average increases of 5% and 6%, respectively, for peak PM<sub>2.5</sub> deposition in TB region (Figure S1). For WAAM, peak PM<sub>10</sub> deposition in the TB region was also highest at 18 volts/65 amperes ( $6.91 \times 10^{-3} \mu\text{g}$ ) and lowest for 25 volts/125 amperes ( $5.8 \times 10^{-3} \mu\text{g}$ ) in the 16–20 age group (Figure S3). Similar to SMAW, peak PM<sub>2.5</sub> deposition in the TB region increased with

age, with the 16–20 age group consistently exhibiting the lowest values ( $1.6 \times 10^{-3} \mu\text{g}$  and  $8.2 \times 10^{-4} \mu\text{g}$  under the same conditions) for WAAM at 18 volt 65 amperes, while the 21–40 and 41–60 age groups showed increases of 4% and 5%, respectively (Figure S3).

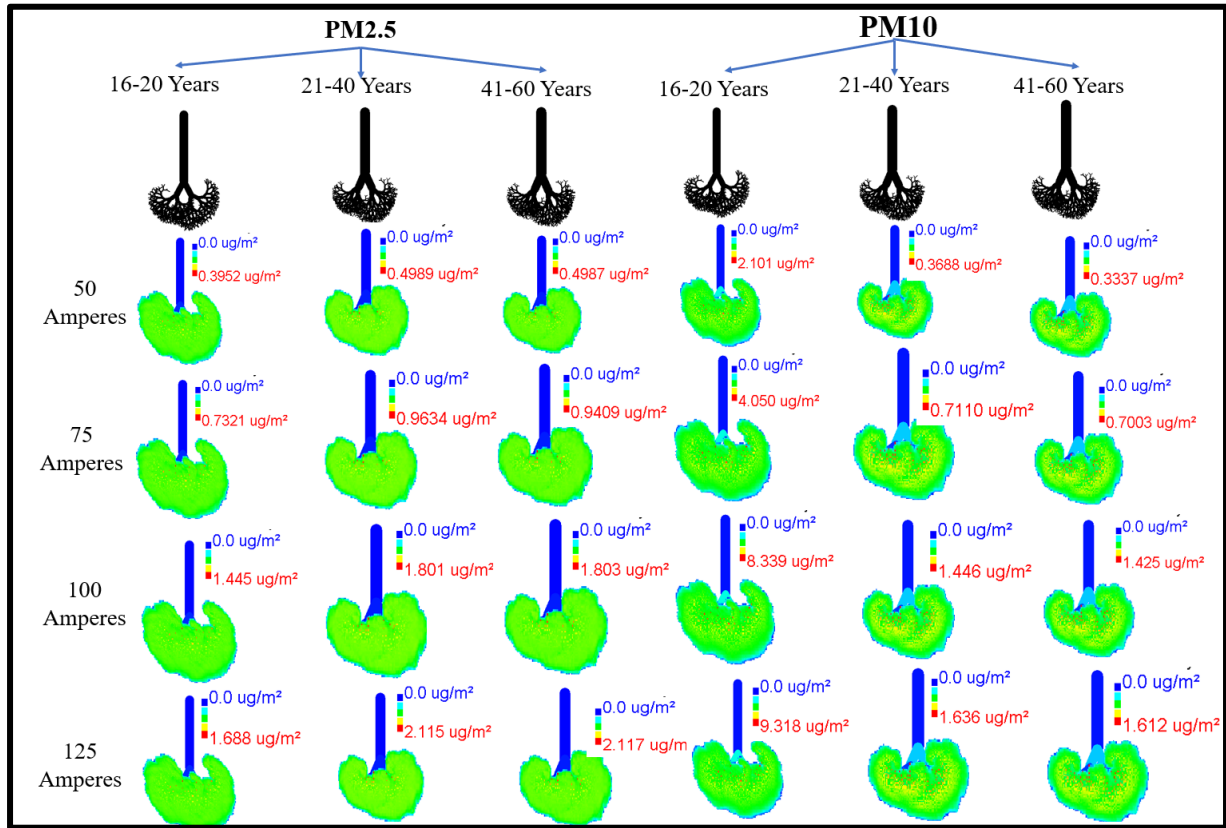

Figure S2: Visualizations of mass deposition per unit area ( $\mu\text{g}/\text{m}^2$ ) in the tracheobronchial (TB) region for PM<sub>10</sub> and PM<sub>2.5</sub> are presented across age groups, based on exposures from shielded metal arc welding (SMAW) at varying current intensities. The color scales for mass deposition differ between particle sizes and age categories due to software limitations, which restricted uniform adjustment of scale settings.

Deposition per unit area revealed distinct age-related trends. For SMAW, the peak PM<sub>10</sub> deposition per unit area in the TB region for the 16–20 age group ranged from 2.1  $\mu\text{g}/\text{m}^2$  to 9.3  $\mu\text{g}/\text{m}^2$  across increasing amperages, significantly higher than older groups due to their larger surface area-to-volume ratio (Figure S2). Peak PM<sub>2.5</sub> deposition per unit area in the TB region was highest in the 40–60 age group at all amperages (Figure S2). For WAAM, the 16–20 age group recorded the peak PM<sub>10</sub> deposition per unit area in TB region was highest at 4.71  $\mu\text{g}/\text{m}^2$  (18 volts/65 amperes) and 3.9  $\mu\text{g}/\text{m}^2$  (25 volts/125 amperes), while peak PM<sub>2.5</sub> deposition per unit area in TB region peaked in the 21–40 age group for all conditions (Figure S3). In WAAM, the peak deposition per unit area of PM<sub>10</sub> was highest in the 16–20 age group, whereas for PM<sub>2.5</sub>, the maximum deposition was observed in the 41–60 age group (Figure S3).

SMAW consistently shows peak PM<sub>2.5</sub> and PM<sub>10</sub> deposition to be higher than WAAM in the TB region. The peak PM<sub>10</sub> deposition in TB region, SMAW exhibited significant deposition

across all amperages (50–125A), with the highest values in the 16–20 age group ( $2.1\text{--}9.3\text{ }\mu\text{g}/\text{m}^2$ ), surpassing WAAM (max  $4.7\text{ }\mu\text{g}/\text{m}^2$ ). The peak  $\text{PM}_{2.5}$  deposition in TB region, is increased with age, peaking in the 21–40 group for SMAW, again exceeding WAAM. While WAAM followed similar age-related trends, its overall deposition was lower. These findings highlight SMAW as a greater contributor to particle exposure than WAAM.

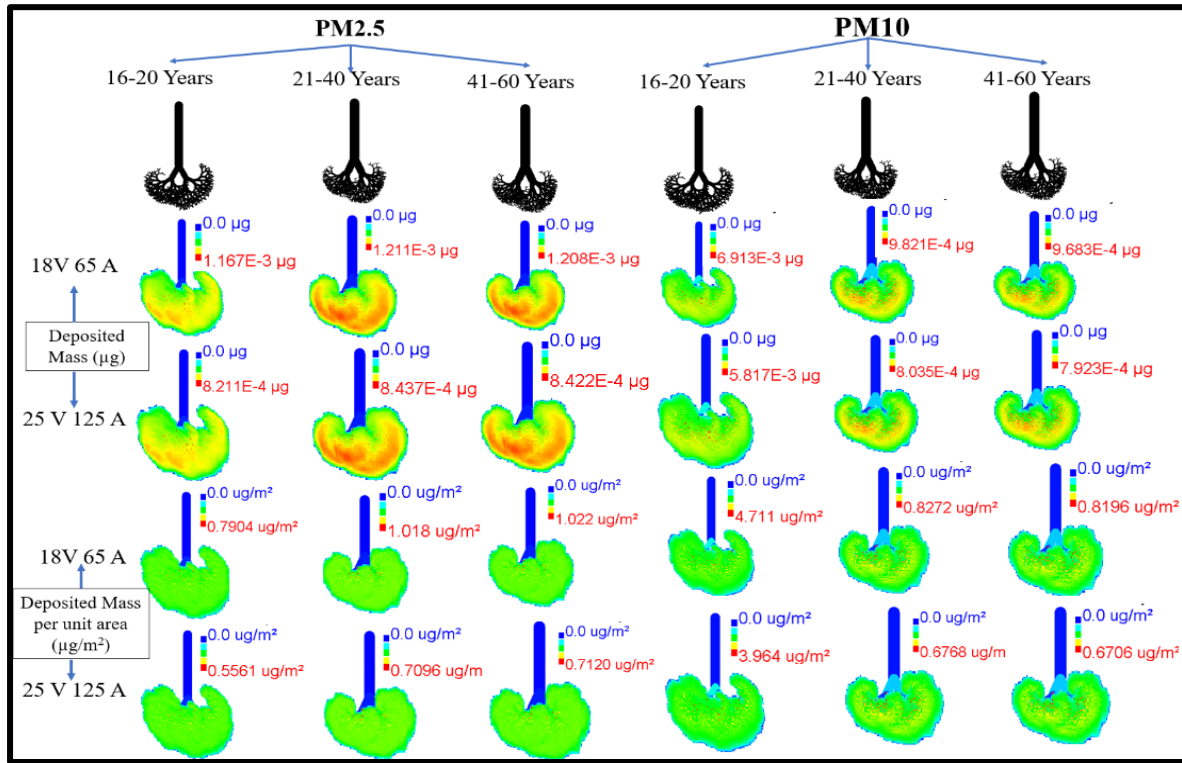

Figure S3: Visualizations of mass deposition (calculated in  $\mu\text{g}$ ) and mass deposition per unit area (measured in  $\mu\text{g}/\text{m}^2$ ) in the tracheobronchial (TB) region for  $\text{PM}_{10}$  and  $\text{PM}_{2.5}$  across different age groups for wire additive arc manufacturing (WAAM) at different current and voltage intensities are presented. It is important to note that the color scales representing mass deposition vary between particle fractions and subjects, as software constraints limited adjustments.

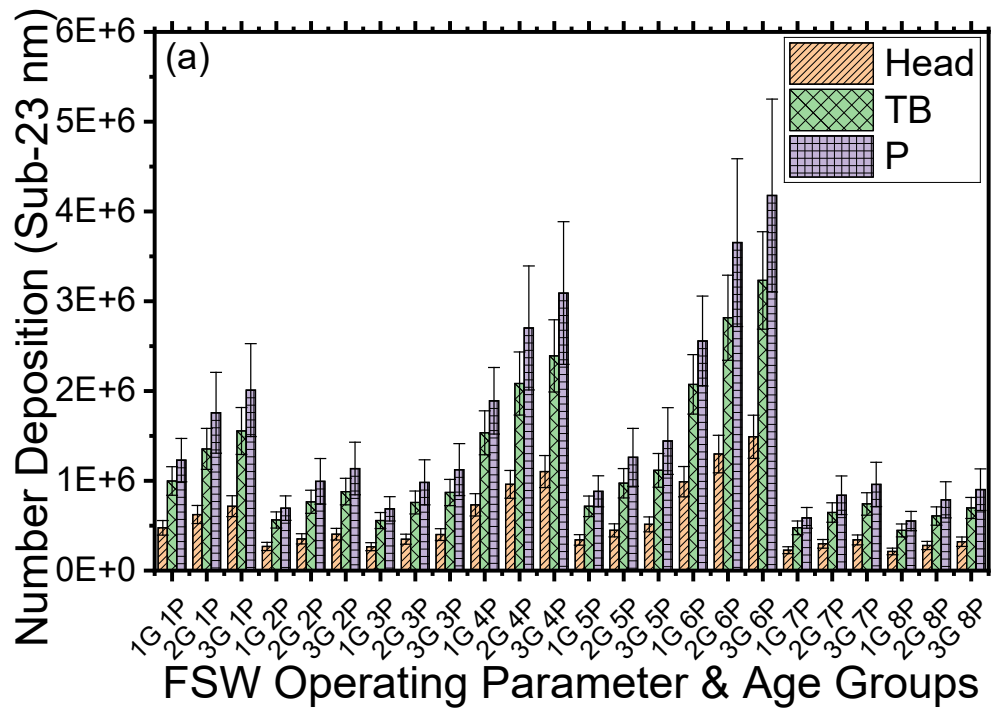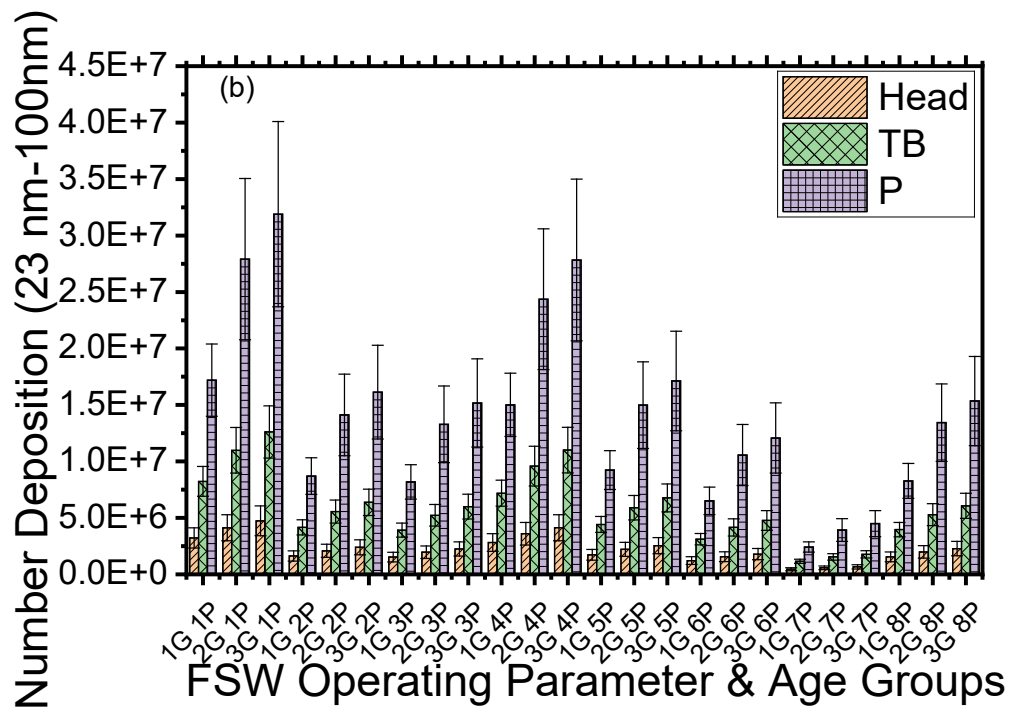

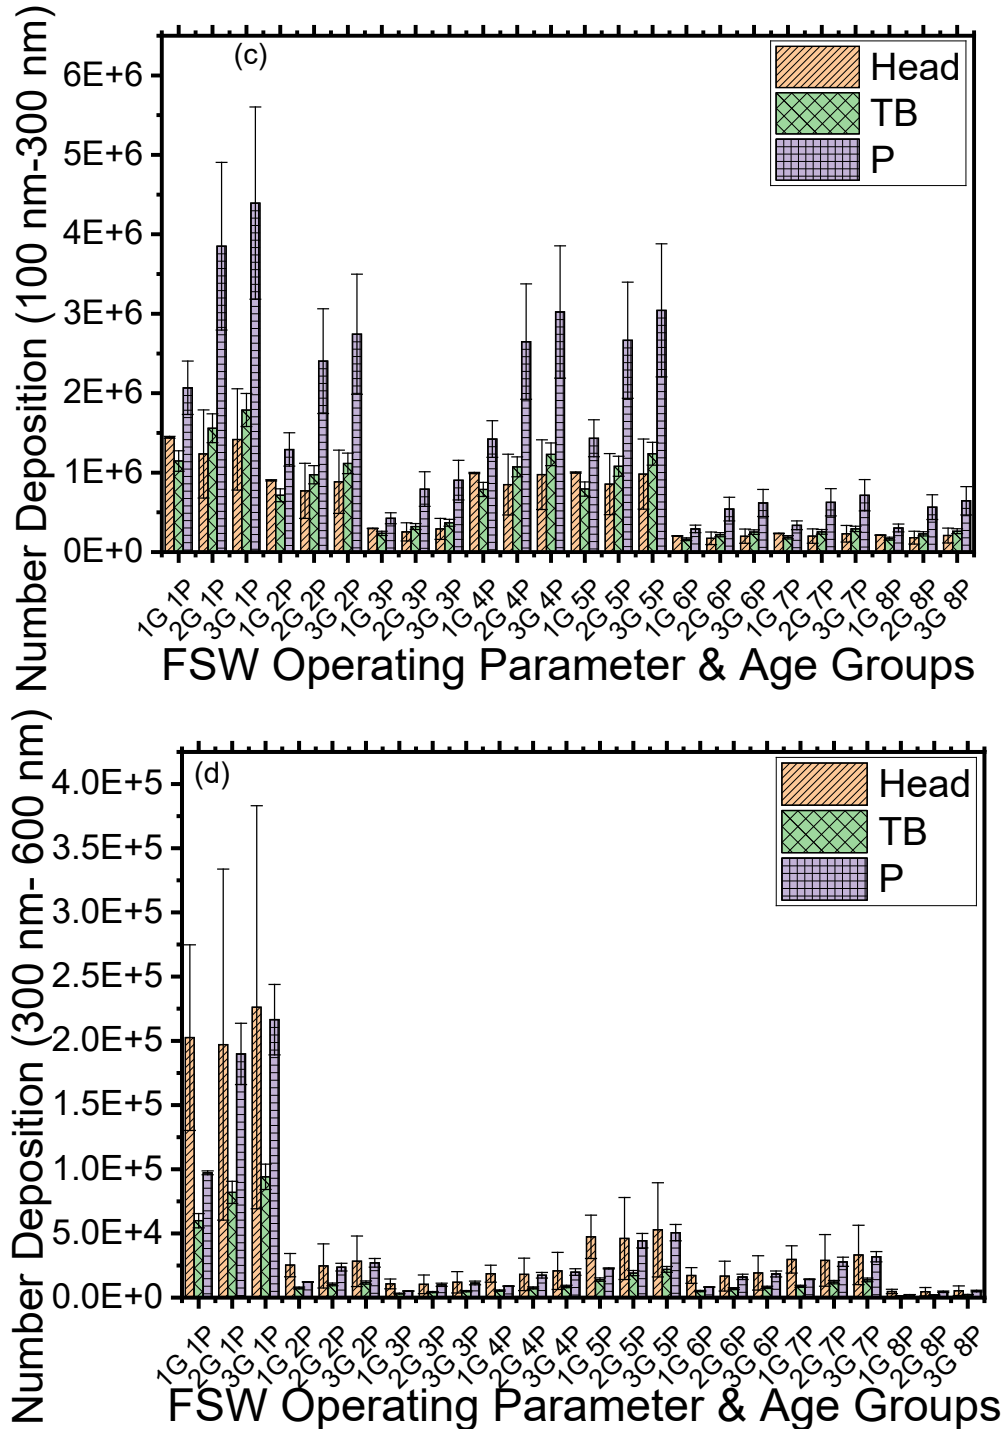

Figure S4: Deposited number of UFP for four size ranges (1:sub 23nm, 2: 23 to 100 nm, 3: 100 nm to 300 nm, 4: 300 nm to 600nm) in the head, tracheobronchial (TB), and pulmonary (P) regions across age groups (1G = 16–20 years, 2G = 21–40 years, 3G = 41–60 years) for friction stir welding (FSW) at different feed rate/RPM (38/1224 (1P), 38/900 (2P), 38/636 (3P), 98/1224 (4P), 98/900 (5P), 98/636 (6P), 58/636 (7P) and 58/1224 (8P)) (a) deposition dose for Sub 23nm UFP range from FSW (b) deposition dose for 23-100 nm UFP range from FSW (c) deposition dose for 100-300 nm UFP range from FSW (d) deposition dose for S300-600 nm UFP range from FSW

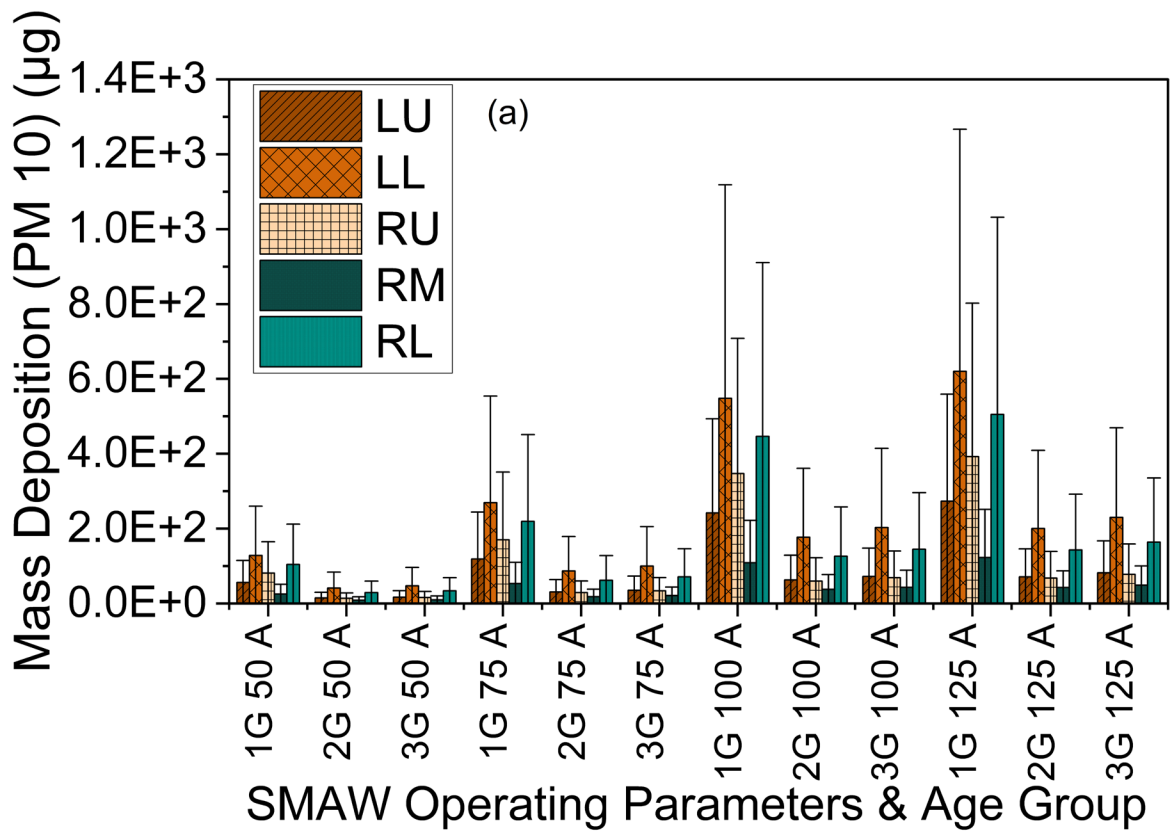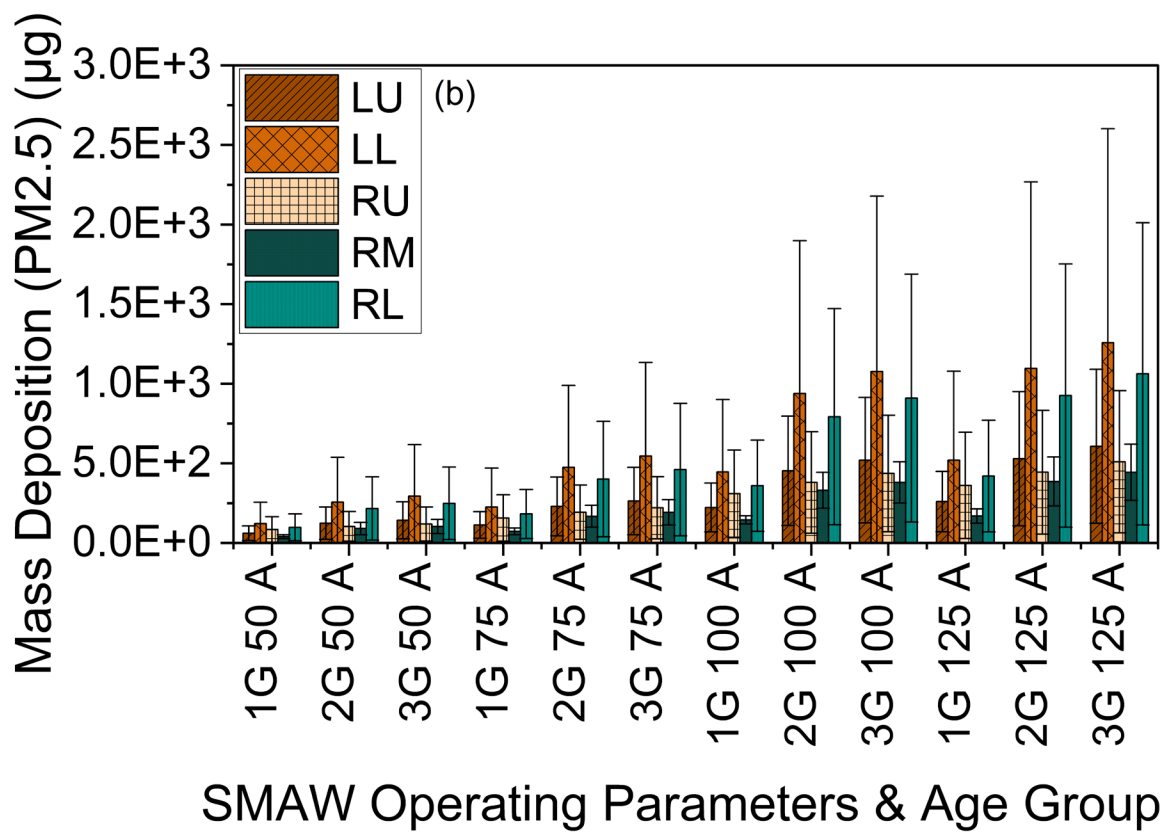

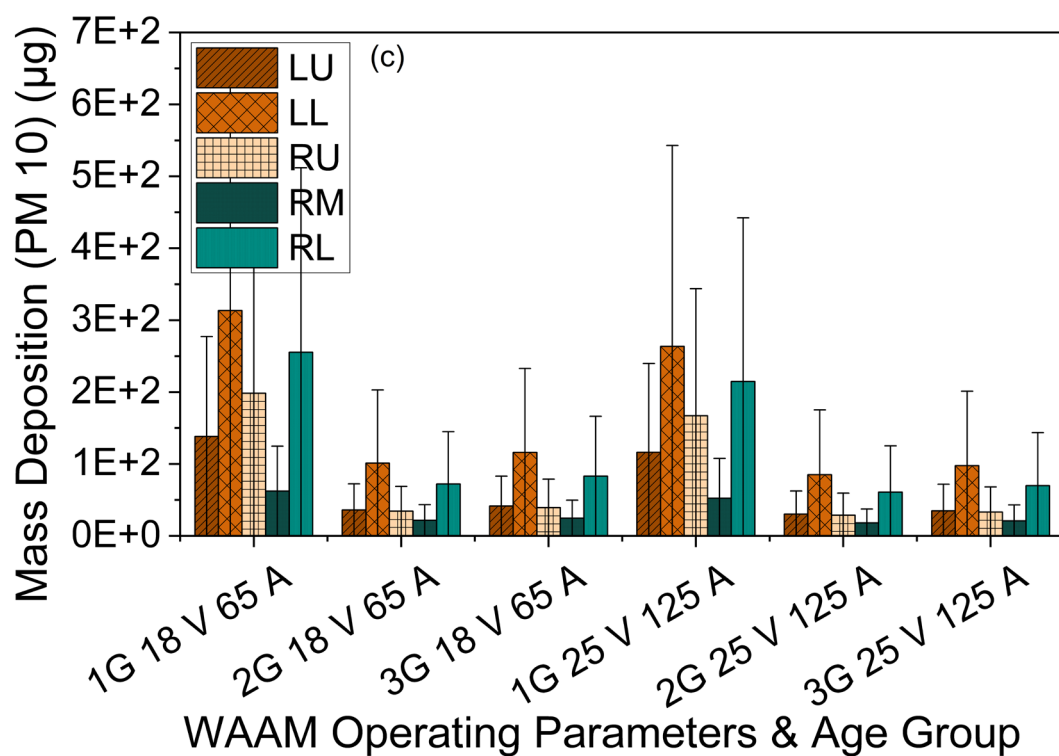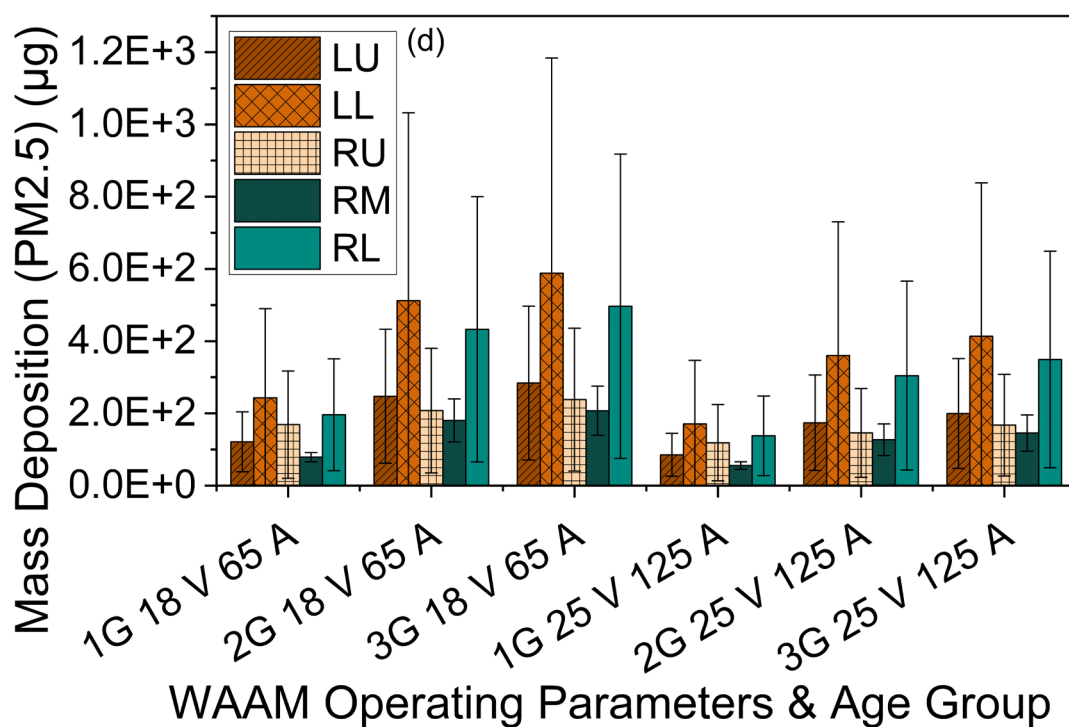

Figure S5: Deposited mass of PM in the right lower lobe (RL), right middle lobe (RM), right upper lobe (RU), left lower lobe (LL) and left upper lobe (LU) regions across age groups (1G = 16–20 years, 2G = 21–40 years, 3G = 41–60 years) for different welding techniques and parameters (a) PM<sub>10</sub> during shielded metal arc welding (SMAW) at 50A, 75A, 100A, and 125A, (b) PM<sub>2.5</sub> during SMAW at 50A, 75A, 100A, and 125A. (c) PM<sub>2.5</sub> during wire additive arc manufacturing (WAAM) at 18V 65A and 25V 125A. and (d) PM<sub>10</sub> during WAAM at 18V 65A and 25V 125A. (A= amperes, V= Volts)



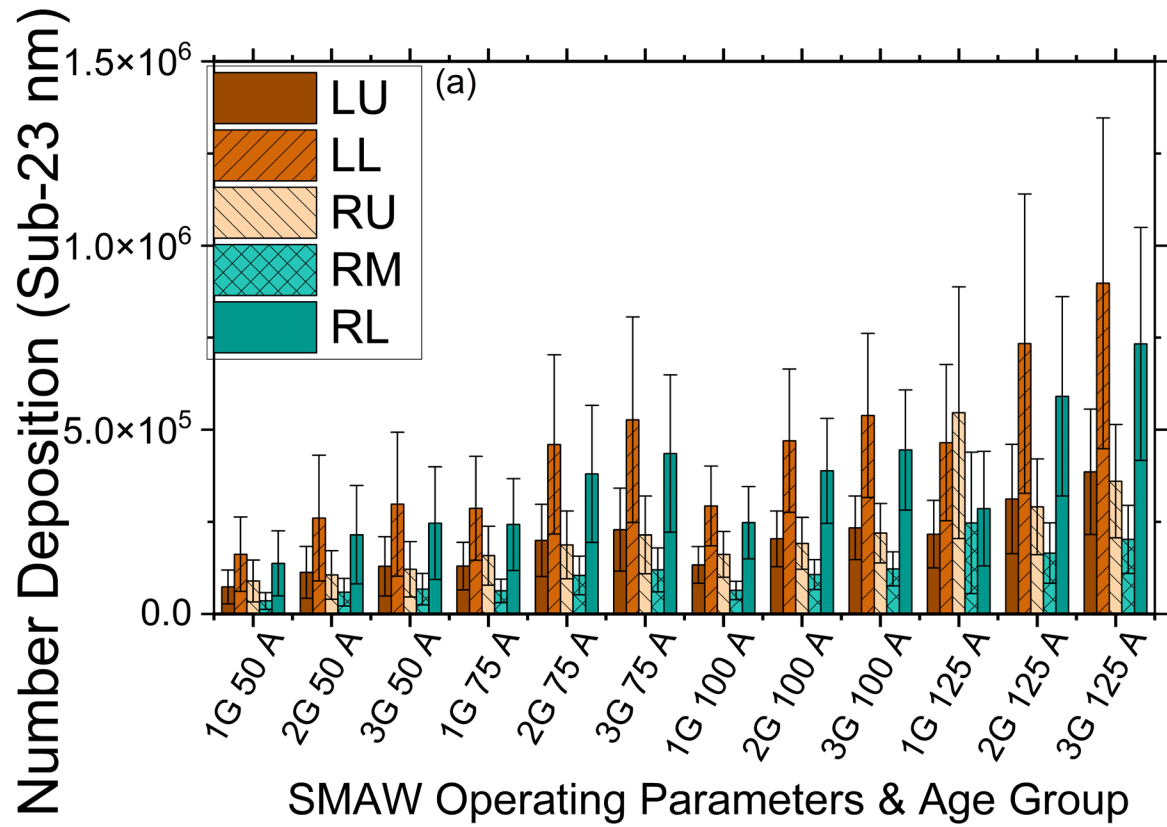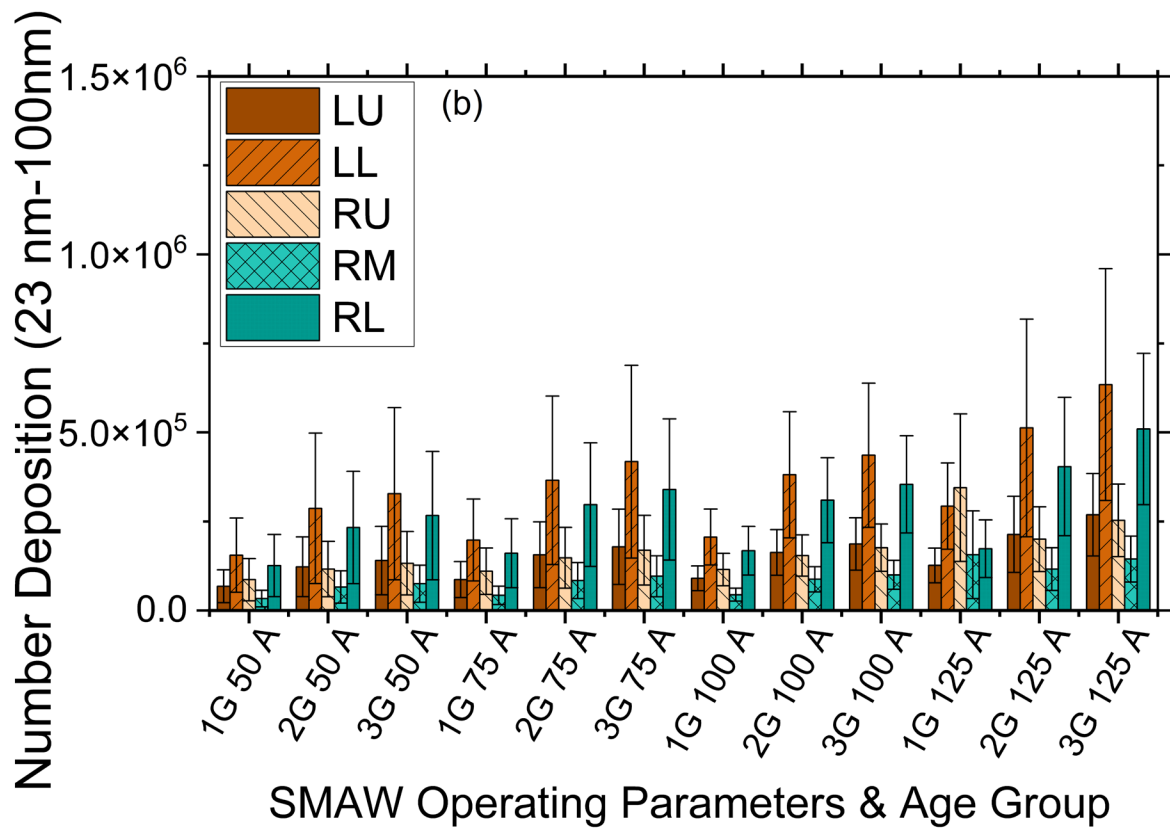



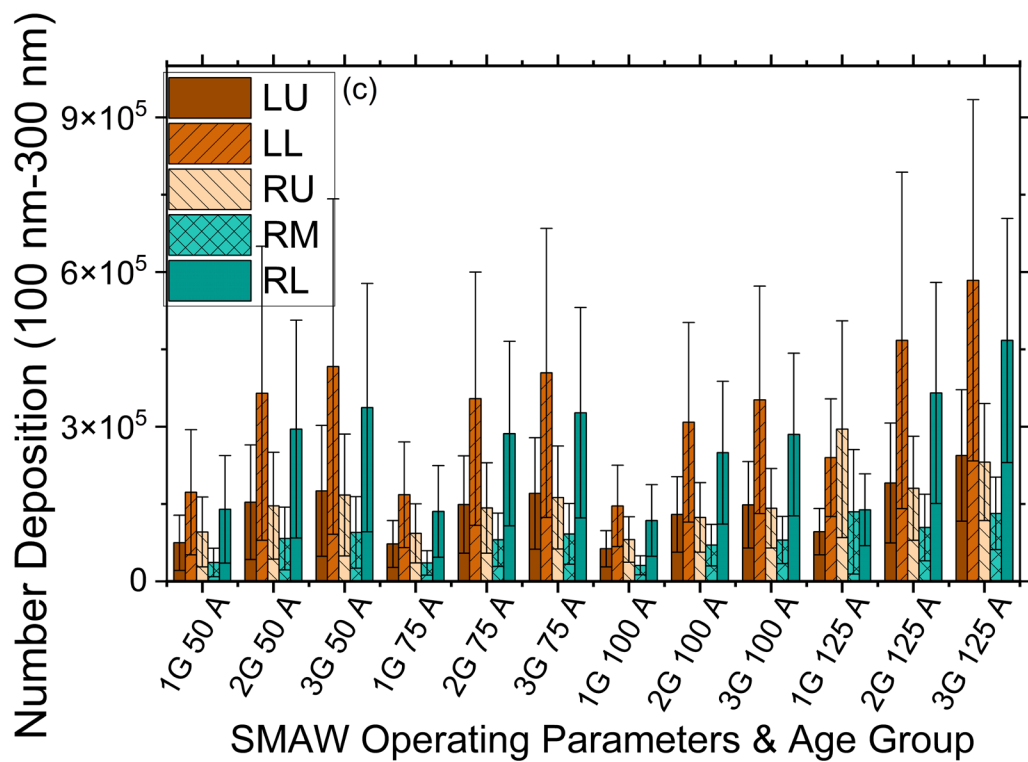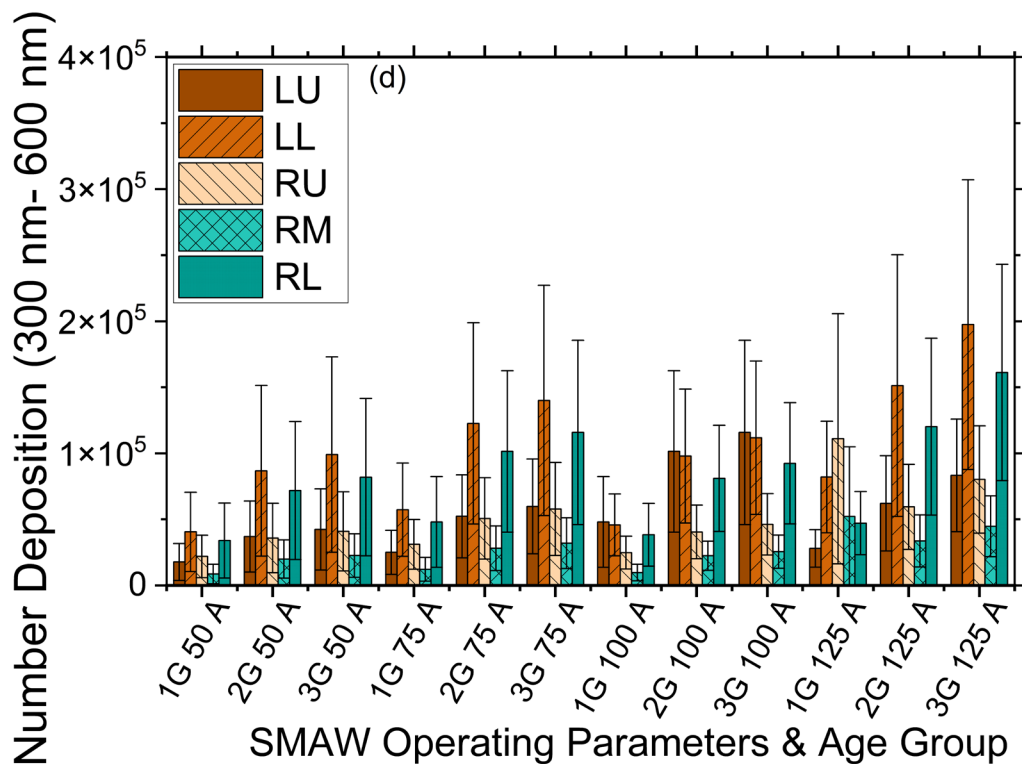

Figure S6 (a): Deposited number of UFP for four size ranges (1:sub 23nm, 2: 23 to 100 nm, 3: 100 nm to 300 nm, 4: 300 nm to 600nm) in the right lower lobe (RL), right middle lobe (RM), right upper lobe (RU), left lower lobe (LL) and left upper lobe (LU) regions across age groups (1G = 16–20 years, 2G = 21–40 years, 3G = 41–60 years) for shielded metal arc welding (SMAW) (50A, 75A, 100A, and 125A)

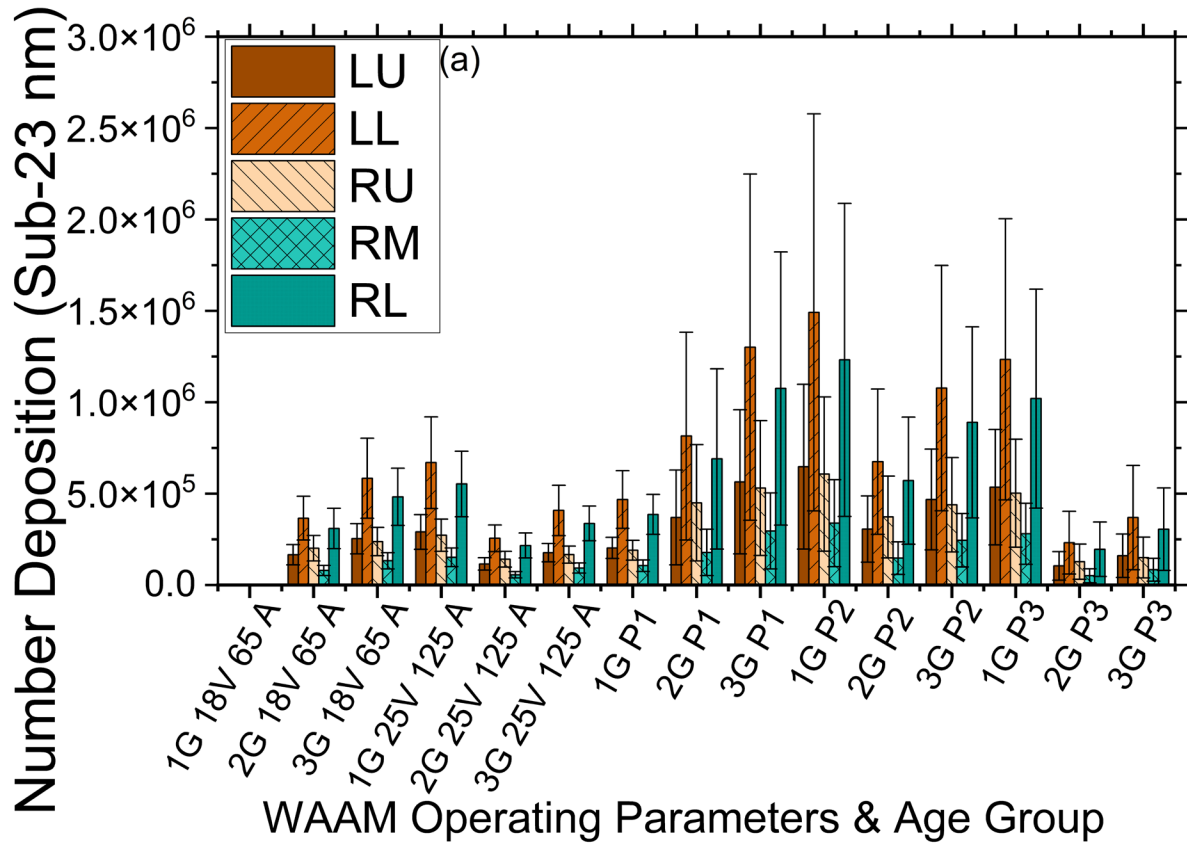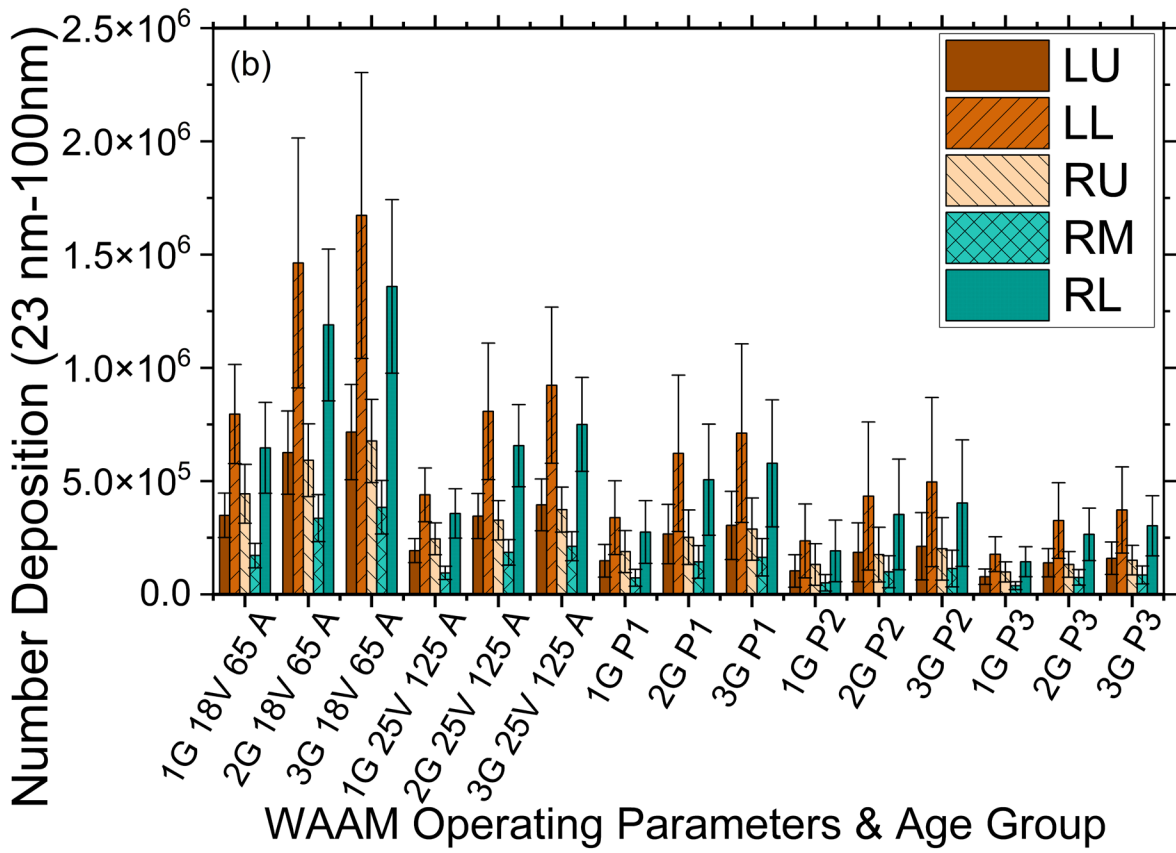

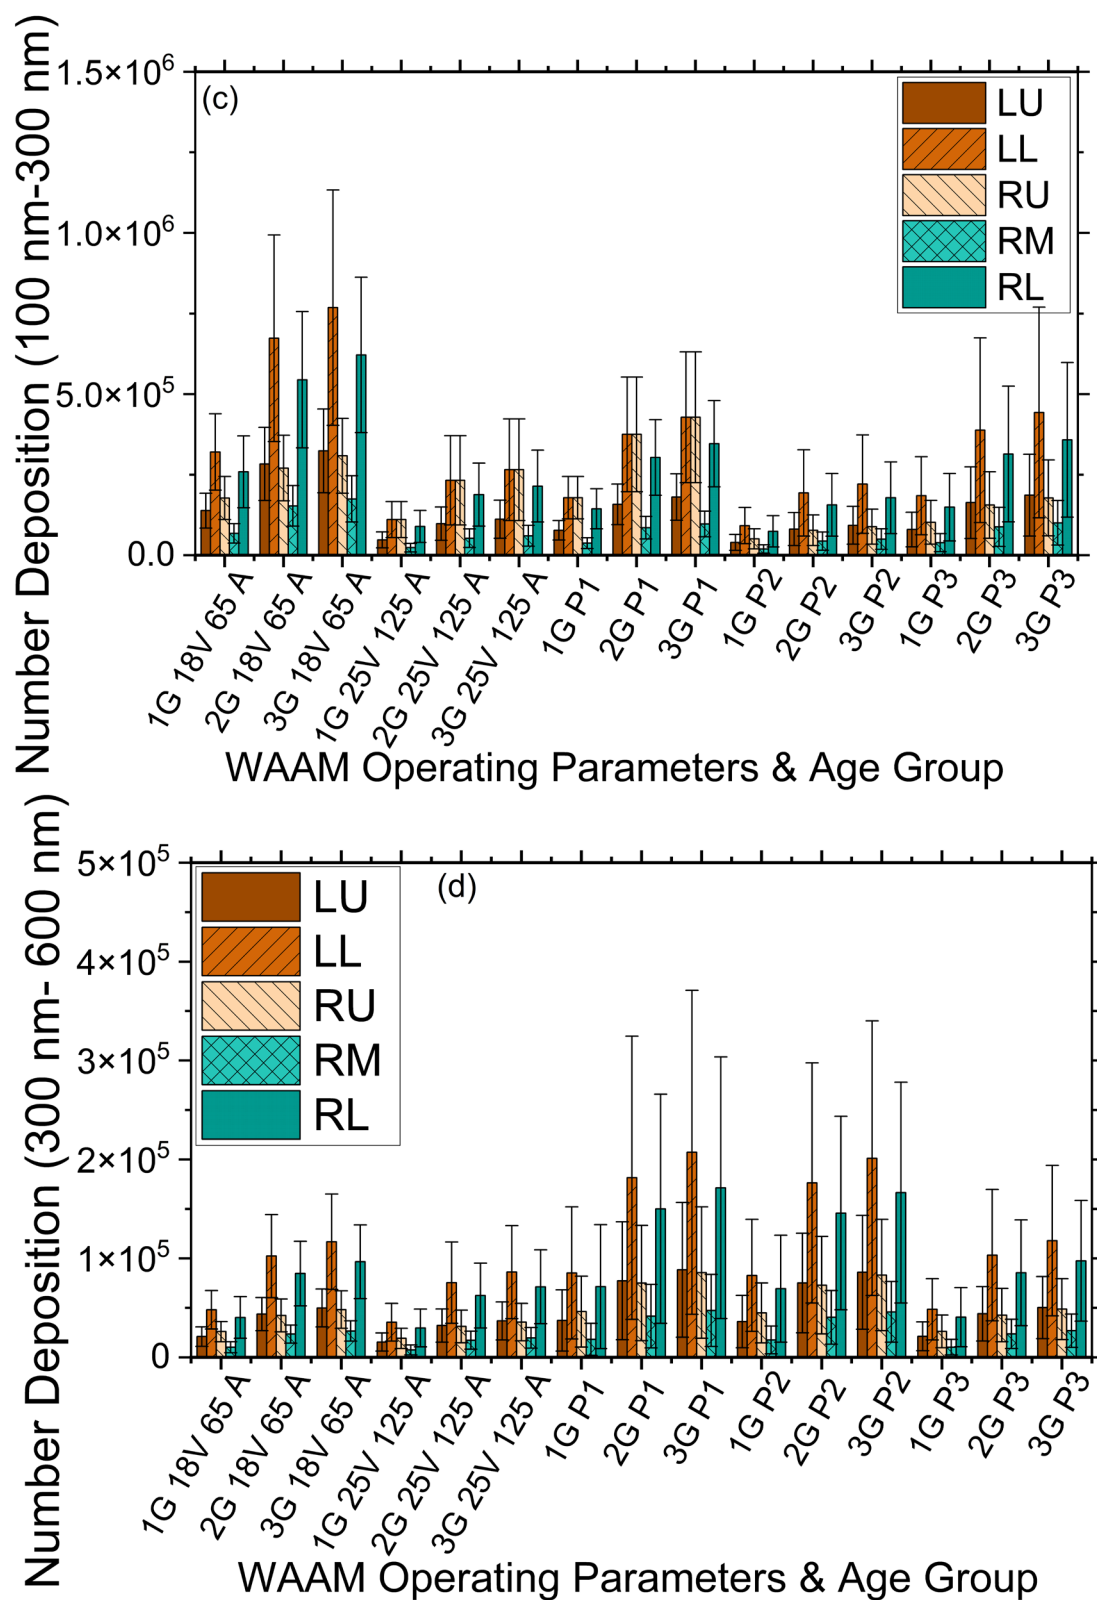

Figure S7 (b): Deposited number of UFP for four size ranges (1: sub 23 nm, 2: 23 to 100 nm, 3: 100 nm to 300 nm, 4: 300 nm to 600 nm) in the right lower lobe (RL), right middle lobe (RM), right upper lobe (RU), left lower lobe (LL) and left upper lobe (LU) regions across age groups (1G = 16–20 years, 2G = 21–40 years, 3G = 41–60 years) for wire additive arc manufacturing (WAAM) (18V-65A, 25V-125A, WAAM with powders (P1: 95–45  $\mu\text{m}$ , P2: 45–25  $\mu\text{m}$ , and P3: less than 25  $\mu\text{m}$ )) (a) deposition dose for Sub 23 nm UFP range from WAAM (b) deposition dose for 23–100 nm UFP range from WAAM (c) deposition dose for 100–300 nm UFP range from WAAM (d) deposition dose for 300–600 nm UFP range from WAAM.

## S1.2 : Lungs retention for PM<sub>2.5</sub> from SMAW and WAAM

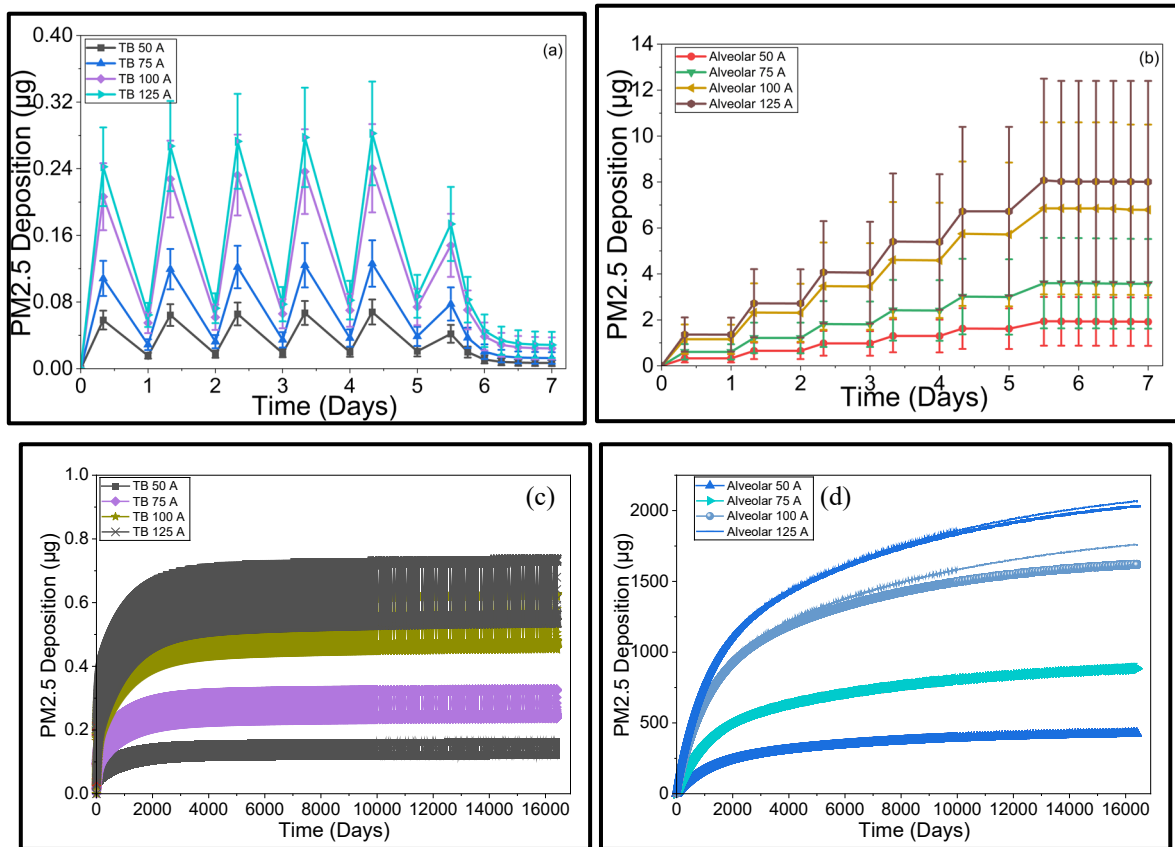

Figure S8: MPPD model predictions of welding fume mass retained in the (a) tracheobronchial (TB) and (b) alveolar regions over exposure periods of up to one week (c) tracheobronchial (TB) regions over exposure periods of up to 45 years, and (d) alveolar regions over exposure periods of 45 years. Simulations were performed using PM<sub>2.5</sub> concentrations measured during SMAW at 50A, 75A, 100A, and 125A for the 21–40 age group. The mean and standard deviation are shown to illustrate the variation in deposition doses across different particle densities (2 g/cm<sup>3</sup> and 7 g/cm<sup>3</sup>).

Following the full one-week simulation, including one day without exposure, allowing only clearance, retention levels decreased to 0.028 µg/cm<sup>2</sup> in the tracheobronchial region and 8.01 µg in the alveolar region. The results presented represent particle retention values at the end of the one-week period. Detailed retention profiles for the tracheobronchial (TB) and alveolar regions, corresponding to different welding techniques, are shown in Figure S8 for SMAW and Figure S9 for WAAM. For SMAW, the highest retention doses in both the alveolar and tracheobronchial regions were observed at 125 Amperes, followed by 100 A, 75 A, and 50 A in decreasing order. In contrast, for WAAM, the 18V 65A setting resulted in greater retention doses than the 25V 125A condition in both lung regions. Figure S8 c, d shows the effects of a lifetime occupational exposure (45 years) at different concentration levels for SMAW at different current ratings. The results highlight a progressive accumulation of particles in the alveolar region, whereas retention in the tracheobronchial region tends to stabilize to a greater

extent. Figure S9 c and d shows the effects of a lifetime occupational exposure (45 years) at different concentration levels for WAAM at different current and voltage ratings.

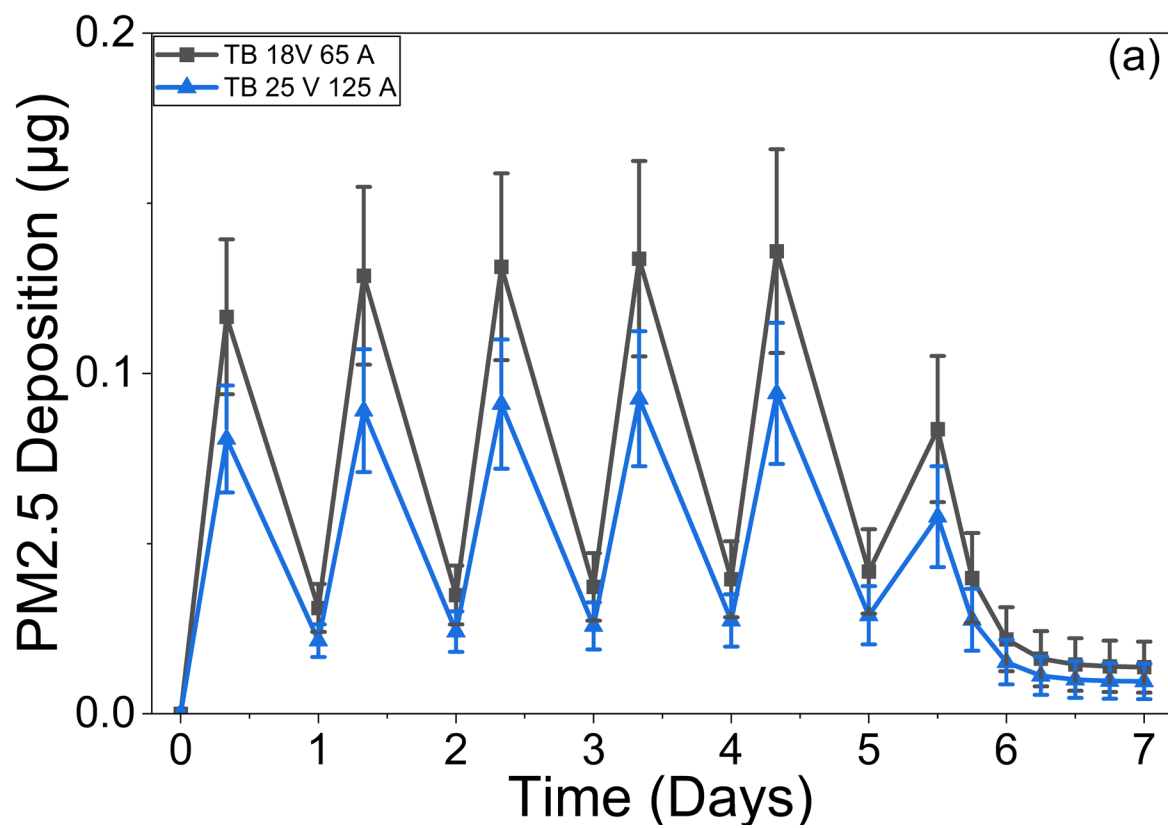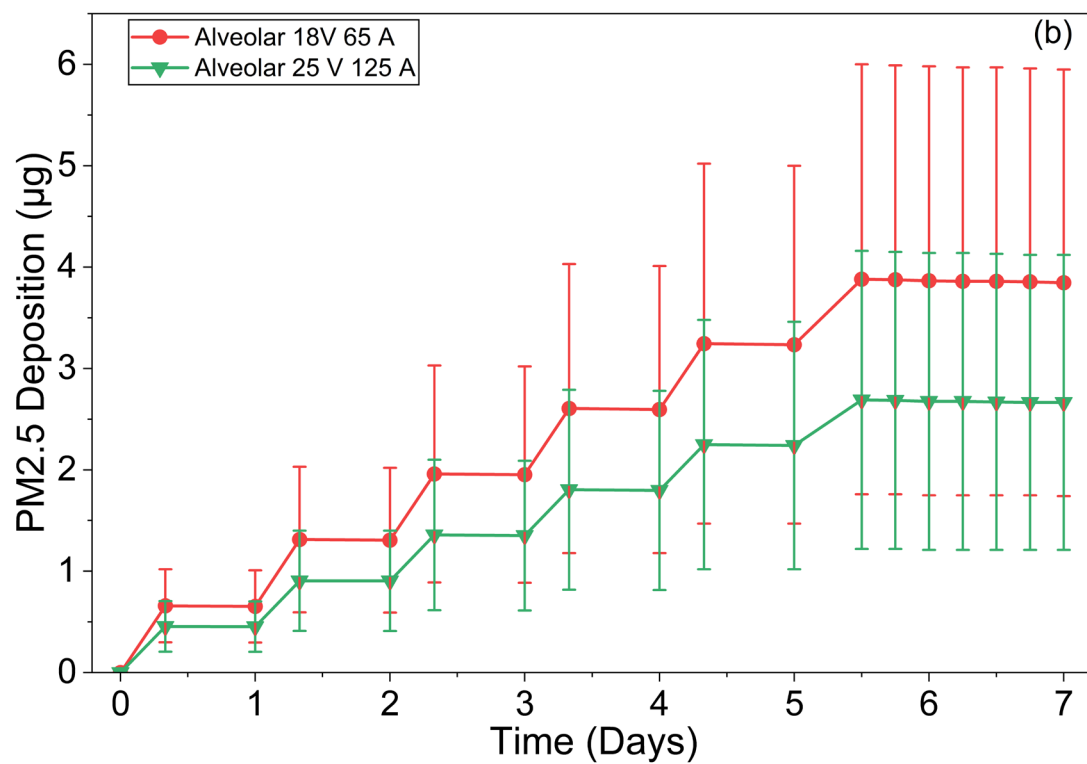

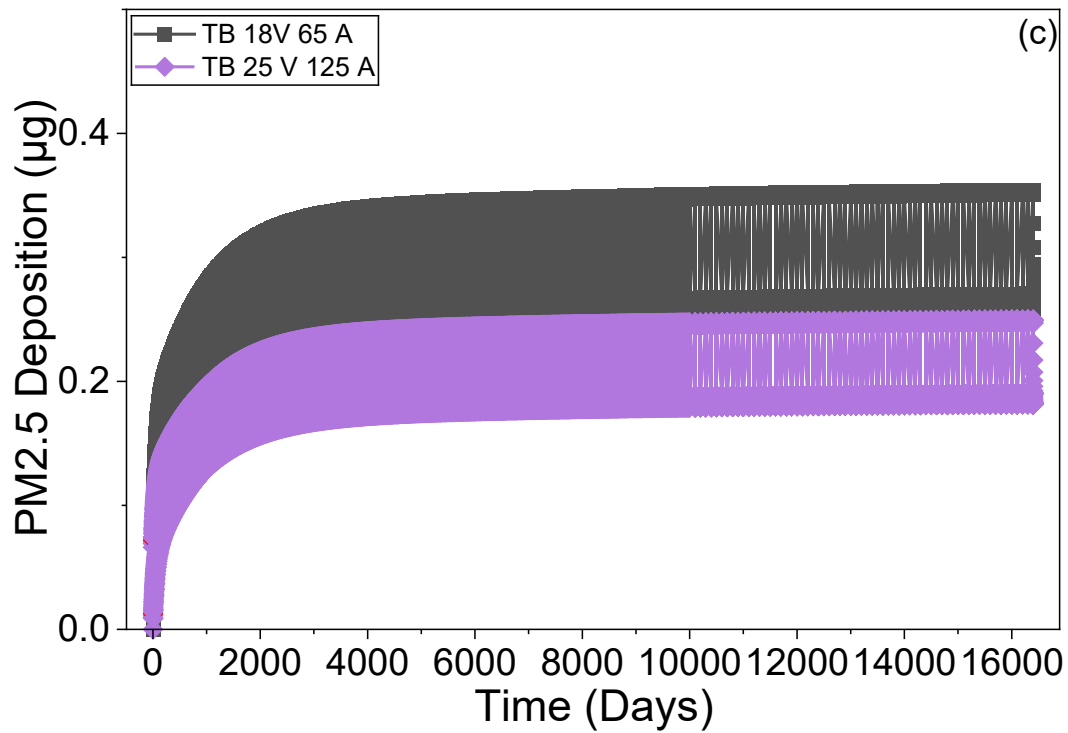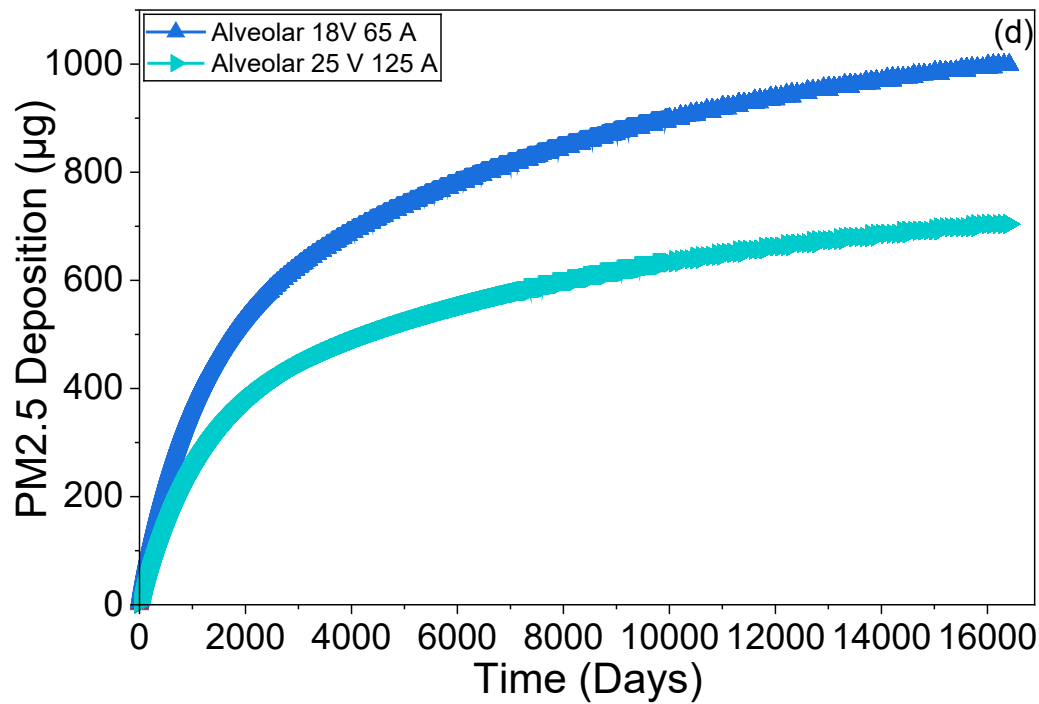

Figure S9: MPPD model predictions of welding fume mass retained in the (a) tracheobronchial (TB) regions over exposure periods of up to one week, (b) alveolar regions over exposure periods of up to one week (c) tracheobronchial (TB) regions over exposure periods of up to 45 years, (d) alveolar regions over exposure periods of 45 years. Simulations were performed using  $\text{PM}_{2.5}$  concentrations measured during WAAM at 18 V–65 A and 25 V–125 A for the 21–40 age group. The mean and standard deviation are shown to illustrate the variation in deposition doses across different particle densities ( $2 \text{ g/cm}^3$  and  $7 \text{ g/cm}^3$ ).

Table S3: The excess risk (ER) and attributable fractions (AF) for all-cause mortality associated with exposure to PM<sub>10</sub>, cardiopulmonary mortality, and lung cancer mortality associated with PM<sub>2.5</sub>

| Welding processes and Parameters | Age Groups | PM <sub>2.5</sub>         |                                         |            | PM <sub>2.5</sub> | PM <sub>10</sub> | All-cause mortality PM <sub>10</sub> |      | Cardiopulmonary mortality PM <sub>2.5</sub> |      | Lung cancer mortality PM <sub>2.5</sub> |      |
|----------------------------------|------------|---------------------------|-----------------------------------------|------------|-------------------|------------------|--------------------------------------|------|---------------------------------------------|------|-----------------------------------------|------|
|                                  |            | LADD                      | SF                                      | ELCR       |                   |                  | ER                                   | AF   | ER                                          | AF   | ER                                      | AF   |
|                                  |            | (µg kg <sup>-1</sup> day) | (µg kg <sup>-1</sup> day) <sup>-1</sup> |            |                   |                  |                                      |      |                                             |      |                                         |      |
| SMAW 50 Amperes                  | 16-20      | 13.07                     | 1.2324E-05                              | 1.6103E-04 | 20.64             | 16.80            | 0.95                                 | 0.49 | 0.54                                        | 0.35 | 0.90                                    | 0.47 |
|                                  | 21-40      | 15.28                     | 8.4412E-06                              | 1.2899E-04 | 20.64             | 16.80            | 0.95                                 | 0.49 | 0.54                                        | 0.35 | 0.90                                    | 0.47 |
|                                  | 41-60      | 17.53                     | 7.3566E-06                              | 1.2899E-04 | 20.64             | 16.80            | 0.95                                 | 0.49 | 0.54                                        | 0.35 | 0.90                                    | 0.47 |
| SMAW 75 Amperes                  | 16-20      | 24.23                     | 1.2324E-05                              | 2.9856E-04 | 38.26             | 35.26            | 3.30                                 | 0.77 | 0.69                                        | 0.41 | 1.19                                    | 0.54 |
|                                  | 21-40      | 28.33                     | 8.4412E-06                              | 2.3916E-04 | 38.26             | 35.26            | 3.30                                 | 0.77 | 0.69                                        | 0.41 | 1.19                                    | 0.54 |
|                                  | 41-60      | 32.51                     | 7.3566E-06                              | 2.3916E-04 | 38.26             | 35.26            | 3.30                                 | 0.77 | 0.69                                        | 0.41 | 1.19                                    | 0.54 |
| SMAW 100 Amperes                 | 16-20      | 47.87                     | 1.2324E-05                              | 5.8995E-04 | 75.61             | 71.74            | 19.56                                | 0.95 | 0.88                                        | 0.47 | 1.57                                    | 0.61 |
|                                  | 21-40      | 55.98                     | 8.4412E-06                              | 4.7257E-04 | 75.61             | 71.74            | 19.56                                | 0.95 | 0.88                                        | 0.47 | 1.57                                    | 0.61 |
|                                  | 41-60      | 64.24                     | 7.3566E-06                              | 4.7257E-04 | 75.61             | 71.74            | 19.56                                | 0.95 | 0.88                                        | 0.47 | 1.57                                    | 0.61 |
| SMAW 125 Amperes                 | 16-20      | 55.90                     | 1.2324E-05                              | 6.8890E-04 | 88.29             | 81.16            | 29.79                                | 0.97 | 0.92                                        | 0.48 | 1.66                                    | 0.62 |
|                                  | 21-40      | 65.37                     | 8.4412E-06                              | 5.5182E-04 | 88.29             | 81.16            | 29.79                                | 0.97 | 0.92                                        | 0.48 | 1.66                                    | 0.62 |
|                                  | 41-60      | 75.01                     | 7.3566E-06                              | 5.5182E-04 | 88.29             | 81.16            | 29.79                                | 0.97 | 0.92                                        | 0.48 | 1.66                                    | 0.62 |
| WAAM 18V 65 Amperes              | 16-20      | 26.13                     | 1.2324E-05                              | 3.2206E-04 | 41.28             | 41.06            | 4.50                                 | 0.82 | 0.71                                        | 0.42 | 1.23                                    | 0.55 |
|                                  | 21-40      | 30.56                     | 8.4412E-06                              | 2.5798E-04 | 41.28             | 41.06            | 4.50                                 | 0.82 | 0.71                                        | 0.42 | 1.23                                    | 0.55 |
|                                  | 41-60      | 35.07                     | 7.3566E-06                              | 2.5798E-04 | 41.28             | 41.06            | 4.50                                 | 0.82 | 0.71                                        | 0.42 | 1.23                                    | 0.55 |
| WAAM 25 Volts 125 Amperes        | 16-20      | 18.38                     | 1.2324E-05                              | 2.2658E-04 | 29.04             | 34.52            | 3.16                                 | 0.76 | 0.62                                        | 0.38 | 1.06                                    | 0.51 |
|                                  | 21-40      | 21.50                     | 8.4412E-06                              | 1.8150E-04 | 29.04             | 34.52            | 3.16                                 | 0.76 | 0.62                                        | 0.38 | 1.06                                    | 0.51 |
|                                  | 41-60      | 24.67                     | 7.3566E-06                              | 1.8150E-04 | 29.04             | 34.52            | 3.16                                 | 0.76 | 0.62                                        | 0.38 | 1.06                                    | 0.51 |

## References

- 1 A. Prüss-Ustün, C. Mathers, C. Corvalan and A. Woodward, .
- 2 E. L. Odekanle, O. O. Sonibare, O. J. Odejobi, B. S. Fakinle and F. A. Akeredolu, *Heliyon*, 2020, **6**, e04365.
